# Supplementary material for: Enzyme-free and highly sensitive detection of human epidermal growth factor receptor-2 based on MNAzyme signal amplification in breast cancer
Source: Royal Society of Chemistry journal article supplement (doi:10.1039/d4tb01813c), 2024-11-14
Supplement: d4tb01813c1.pdf [file d4tb01813c1.pdf]

## Enzyme-free and Highly Sensitive Detection of Human Epidermal Growth Factor-2 Based on the MNAzyme Signal Amplification in Breast Cancer

Feifan Yin<sup>a1</sup>, Zhiqiang Hou<sup>a1</sup>, Yanheng Yao<sup>a</sup>, Miao He<sup>a</sup>, Yang Xiang<sup>a,b,\*</sup>, Zhongyun Wang<sup>c,\*</sup>

<sup>a</sup>State Key Laboratory of Pharmaceutical Biotechnology, School of Life Sciences, Nanjing University, Nanjing 210023, P. R. China

<sup>b</sup>State Key Laboratory of Natural and Biomimetic Drugs, Peking University, Beijing 100191, P. R. China

<sup>c</sup>Department of Anesthesiology, The First Affiliated Hospital of Nanjing Medical University, Nanjing 210029, P. R. China

\*Corresponding authors.

E-mail address: xiangy@nju.edu.cn (Y. Xiang), zywang1970@126.com (Z. Wang)

<sup>1</sup>These authors contributed equally to this work.

## Contents

|                                                                                                |          |
|------------------------------------------------------------------------------------------------|----------|
| <b>Table S1.</b> The DNA sequences used in this work .....                                     | <b>3</b> |
| <b>Table S2.</b> Comparison of different biosensors for the detection of HER2 .....            | <b>4</b> |
| <b>Table S3.</b> Recoveries of HER2 in spiked serum samples from healthy people .....          | <b>5</b> |
| <b>Figure S1.</b> The characterization of DNA-functionalized streptavidin magnetic beads ..... | <b>6</b> |
| <b>Figure S2.</b> The calibration curve obtained by commercial ELISA kit .....                 | <b>7</b> |
| <b>References.</b> .....                                                                       | <b>8</b> |

**Table S1.** The DNA sequences used in this work.

| <b>Name</b>     | <b>Sequence (5'-3')</b>                                            |
|-----------------|--------------------------------------------------------------------|
| HER2<br>Aptamer | AATTAAGCCGCGAGGGGAGGGATAGGGTAGGGCGCGGCT                            |
| cDNA            | CGGCGCTCCCCTCCCTATCCCATCCCG                                        |
| Partzyme A      | CAGTCAGAGGCTAGCTGAGGGGAGCGCCG                                      |
| Partzyme B      | CGGGATGGGATAGGACAACGAGGTCCATG                                      |
| Substrate       | Biotin-<br>TTTTTTTTTTTTTTTTTTTTTTCATGGACCrGrUCTGACTGTTTTTTTTTT-FAM |

**Table S2.** Comparison of different biosensors for the detection of HER2.

| Type of sensors/Method                                                                           | Time       | Detection limit            | Linear range                     | Standard method | Ref.      |
|--------------------------------------------------------------------------------------------------|------------|----------------------------|----------------------------------|-----------------|-----------|
| Electrochemical/Reduced graphene oxide-chitosan-aptamer interface                                | 3 hours    | 0.21 ng/mL                 | 0.5-2 ng/mL<br>and 2-75 ng/mL    | ELISA           | [1]       |
| Electrochemical/A HER2 specific peptide immobilized onto a gold electrode surface                | > 10 hours | 0.047 pg/ mL               | 1-100 pg/mL                      | No              | [2]       |
| Electrochemical/A sandwich-type electrochemical immunosensor based on in situ silver deposition  | 123 min    | $2.0 \times 10^{-5}$ ng/mL | $5.0 \times 10^{-4}$ -50.0 ng/mL | ELISA           | [3]       |
| Electrochemical/Based on 3,4-ethylenedioxythiophene (PEDOT) and a biocompatible peptide hydrogel | > 12 hours | 45 pg/mL                   | 0.1 ng/mL-1.0 $\mu$ g/mL         | ELISA           | [4]       |
| Fluorescence/ Based on the proximity of G-rich sequences to Ag nanoclusters                      | 160 min    | 0.0904 fM                  | 8.5-340 fM                       | ELISA           | [5]       |
| Fluorescence/Near-infrared MnCuInS/ZnS@BSA and urchin-like AuNP as a novel donor-acceptor pair   | 2 hours    | 1 ng/mL                    | 2-100 ng/ml                      | ELISA           | [6]       |
| Fluorescence/Three-dimensional DNA walker                                                        | 190 min    | 0.01 ng/mL                 | 0.5-5 ng/mL                      | No              | [7]       |
| Fluorescence/The MNAzyme Signal Amplification                                                    | 3 hours    | 0.02 ng/mL                 | 0.5-100 ng/mL                    | ELISA           | This work |

**Table S3.** Recoveries of HER2 in spiked serum samples from healthy people.

| <b>Sample</b> | <b>Added (ng/mL)</b> | <b>Determined (ng/mL)</b> | <b>RSD</b> | <b>Recovery (%)</b> |
|---------------|----------------------|---------------------------|------------|---------------------|
| 1             | 0                    | 0.73 ± 0.11               | 0.150      | ~                   |
| 2             | 0.5                  | 0.56 ± 0.02               | 0.035      | 112.0               |
| 3             | 1                    | 1.08 ± 0.09               | 0.083      | 108.0               |
| 4             | 5                    | 4.93 ± 0.23               | 0.047      | 98.6                |
| 5             | 10                   | 10.44 ± 0.32              | 0.031      | 104.4               |

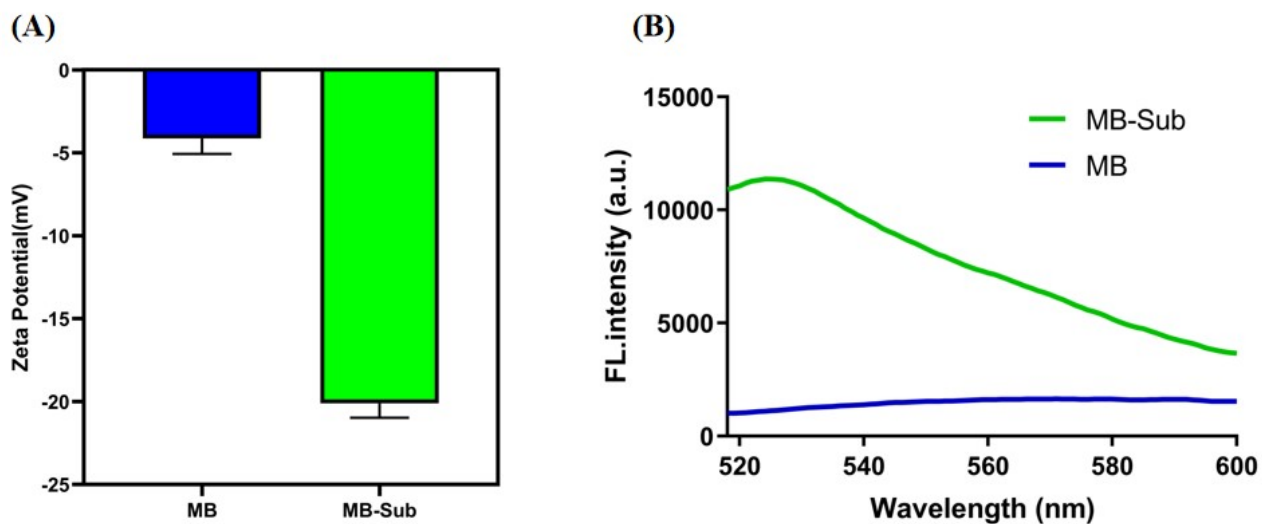

**Figure S1.** The characterization of DNA-functionalized streptavidin magnetic beads. **(A)** Zeta potential analysis before and after substrate modification of magnetic beads. (MB: streptavidin magnetic beads, MB-Sub: Substrate-functionalized streptavidin magnetic beads) **(B)** The fluorescent spectra of streptavidin magnetic beads (MB) and DNA-functionalized streptavidin magnetic beads (MB-Sub).

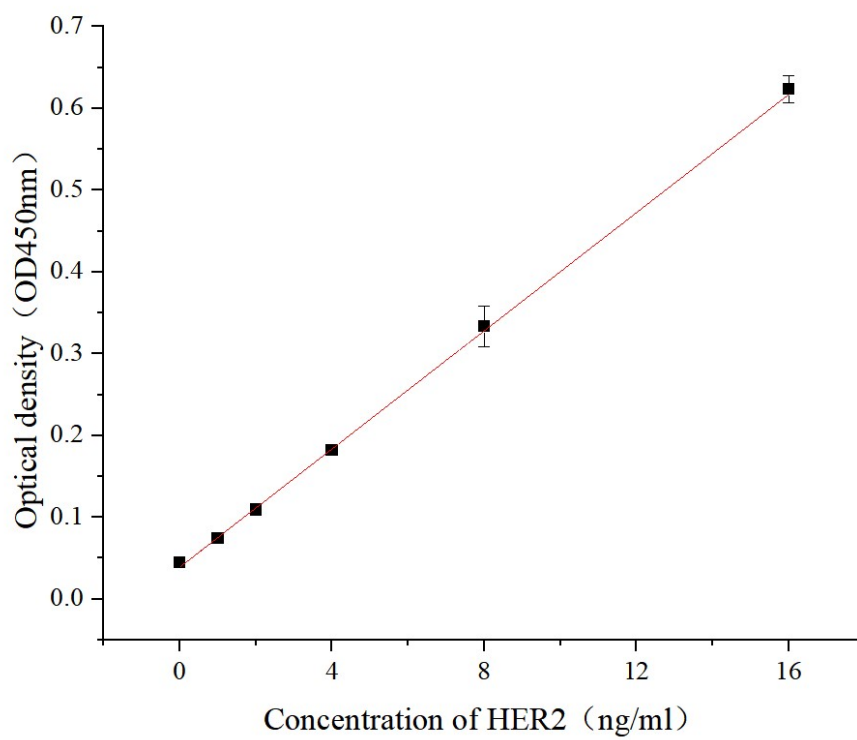

**Figure S2.** The calibration curve obtained by commercial ELISA kit.

## References.

- [1] A. Tabasi, A. Noorbakhsh and E. Sharifi, *Biosens. Bioelectron.*, 2017, **95**, 117-123.
- [2] L. Hu, S. Hu, L. Guo, C. Shen, M. Yang and A. Rasooly, *Anal. Chem.*, 2017, **89**(4), 2547-2552.
- [3] M. Shamsipur, M. Emami, L. Farzin and Saber R, *Biosens. Bioelectron.*, 2018, **103**, 54-61.
- [4] W. Wang, R. Han, M. Chen and Luo X, *Anal. Chem.*, 2021, **93**(19), 7355-7361.
- [5] M. Zhang, G. Gao, Y. Ding, C. Deng, J. Xiang and H. Wu, *Talanta*, 2019, **199**, 238-243.
- [6] H. Xing, T. Wei, X. Lin and Z. Dai, *Anal. Chim. Acta*, 2018, **1042**, 71-78.
- [7] Y. Y. Xie, S. H. Si, C. Y. Deng and H. Y. Wu, *Talanta*, 2023, **253**, 124071.
